# Supplementary material for: Brazilian Food Banks: Overview and Perspectives
Source: MDPI journal article supplement (doi:10.3390/ijerph182312598), 2021-11-29
Supplement: s1 [file s1]

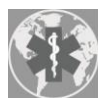

# Supplementary Material

**Table S1.** Goals of Brazilian food banks and research variables.

| Goals of<br>Brazilian food banks            | Research variables <sup>a</sup>                                                     |
|---------------------------------------------|-------------------------------------------------------------------------------------|
| 1. Combating food losses and wastes         | Profile of partner donors<br>Network articulation                                   |
| 2. Guarantee of food and nutrition security | Beneficiary profile<br>Volume of food traded<br>Nutritional profile of traded foods |
| 3. Food and nutrition education actions     | Realization and profile of educational activities                                   |

<sup>a</sup> Evaluation variables extracted from Tenuta [2] and adapted by the authors.

**Table S2.** Distribution of food banks in Brazil in 2019, by region and by state, according to operational modality ( $n = 217$ ).

|                         | Conventional food bank<br>( $n = 140$ ) |               | Urban harvesting food banks<br>( $n = 77$ ) |               |
|-------------------------|-----------------------------------------|---------------|---------------------------------------------|---------------|
| <b>BRAZIL</b>           | <b>140</b>                              | <b>64.52%</b> | <b>77</b>                                   | <b>35.48%</b> |
| <b>NORTH REGION</b>     | <b>6</b>                                | <b>40.00%</b> | <b>9</b>                                    | <b>60.00%</b> |
| Amazonas                | 1                                       | 100.00%       | 0                                           | 0.00%         |
| Acre                    | 1                                       | 50.00%        | 1                                           | 50.00%        |
| Rondônia                | 0                                       | 0.00%         | 2                                           | 100.00%       |
| Roraima                 | 1                                       | 50.00%        | 1                                           | 50.00%        |
| Amapá                   | 0                                       | 0.00%         | 1                                           | 100.00%       |
| Pará                    | 0                                       | 0.00%         | 4                                           | 100.00%       |
| Tocantins               | 3                                       | 100.00%       | 0                                           | 0.00%         |
| <b>NORTHEAST REGION</b> | <b>28</b>                               | <b>66.67%</b> | <b>14</b>                                   | <b>33.33%</b> |
| Maranhão                | 1                                       | 33.33%        | 2                                           | 66.67%        |
| Piauí                   | 2                                       | 40.00%        | 3                                           | 60.00%        |
| Rio Grande do Norte     | 1                                       | 33.33%        | 2                                           | 66.67%        |
| Ceará                   | 5                                       | 83.33%        | 1                                           | 16.67%        |
| Paraíba                 | 8                                       | 100.00%       | 0                                           | 0.00%         |
| Bahia                   | 4                                       | 57.14%        | 3                                           | 42.86%        |
| Pernambuco              | 5                                       | 83.33%        | 1                                           | 16.67%        |
| Alagoas                 | 2                                       | 100.00%       | 0                                           | 0.00%         |
| Sergipe                 | 0                                       | 0.00%         | 2                                           | 100.00%       |
| <b>SOUTHEAST REGION</b> | <b>60</b>                               | <b>62.50%</b> | <b>36</b>                                   | <b>37.50%</b> |
| Minas Gerais            | 28                                      | 66.67%        | 14                                          | 33.33%        |
| Espírito Santo          | 4                                       | 100.00%       | 0                                           | 0.00%         |
| Rio de Janeiro          | 6                                       | 100.00%       | 0                                           | 0.00%         |
| São Paulo               | 22                                      | 50.00%        | 22                                          | 50.00%        |
| <b>SOUTH REGION</b>     | <b>35</b>                               | <b>68.63%</b> | <b>16</b>                                   | <b>31.37%</b> |
| Santa Catarina          | 4                                       | 50.00%        | 4                                           | 50.00%        |
| Paraná                  | 9                                       | 69.23%        | 4                                           | 30.77%        |
| Rio Grande do Sul       | 22                                      | 73.33%        | 8                                           | 26.67%        |

---

|                            |           |               |          |               |
|----------------------------|-----------|---------------|----------|---------------|
| <b>CENTRAL-WEST REGION</b> | <b>11</b> | <b>84.62%</b> | <b>2</b> | <b>15.38%</b> |
| Goiás                      | 4         | 100.00%       | 0        | 0.00%         |
| Mato Grosso                | 4         | 100.00%       | 0        | 0.00%         |
| Mato Grosso do Sul         | 1         | 33.33%        | 2        | 66.67%        |
| Federal District           | 2         | 100.00%       | 0        | 0.00%         |

---
